# Supplementary material for: Preexisting Diabetes Elevates Risk of Local and Systemic Complications in Acute Pancreatitis: Systematic Review and Meta-analysis
Source: PubMed Central journal article supplement — Pancreas. 2018 Aug 16;47(8):917–23. doi: 10.1097/MPA.0000000000001122 (PMC6133223; doi:10.1097/mpa.0000000000001122), 2018-08-16
Supplement: mpa-47-917-s001.pdf [file mpa-47-917-s001.pdf]

# Pre-existing Diabetes Elevates Risk of Local and Systemic Complications in Acute Pancreatitis

## *Systematic Review and Meta-analysis*

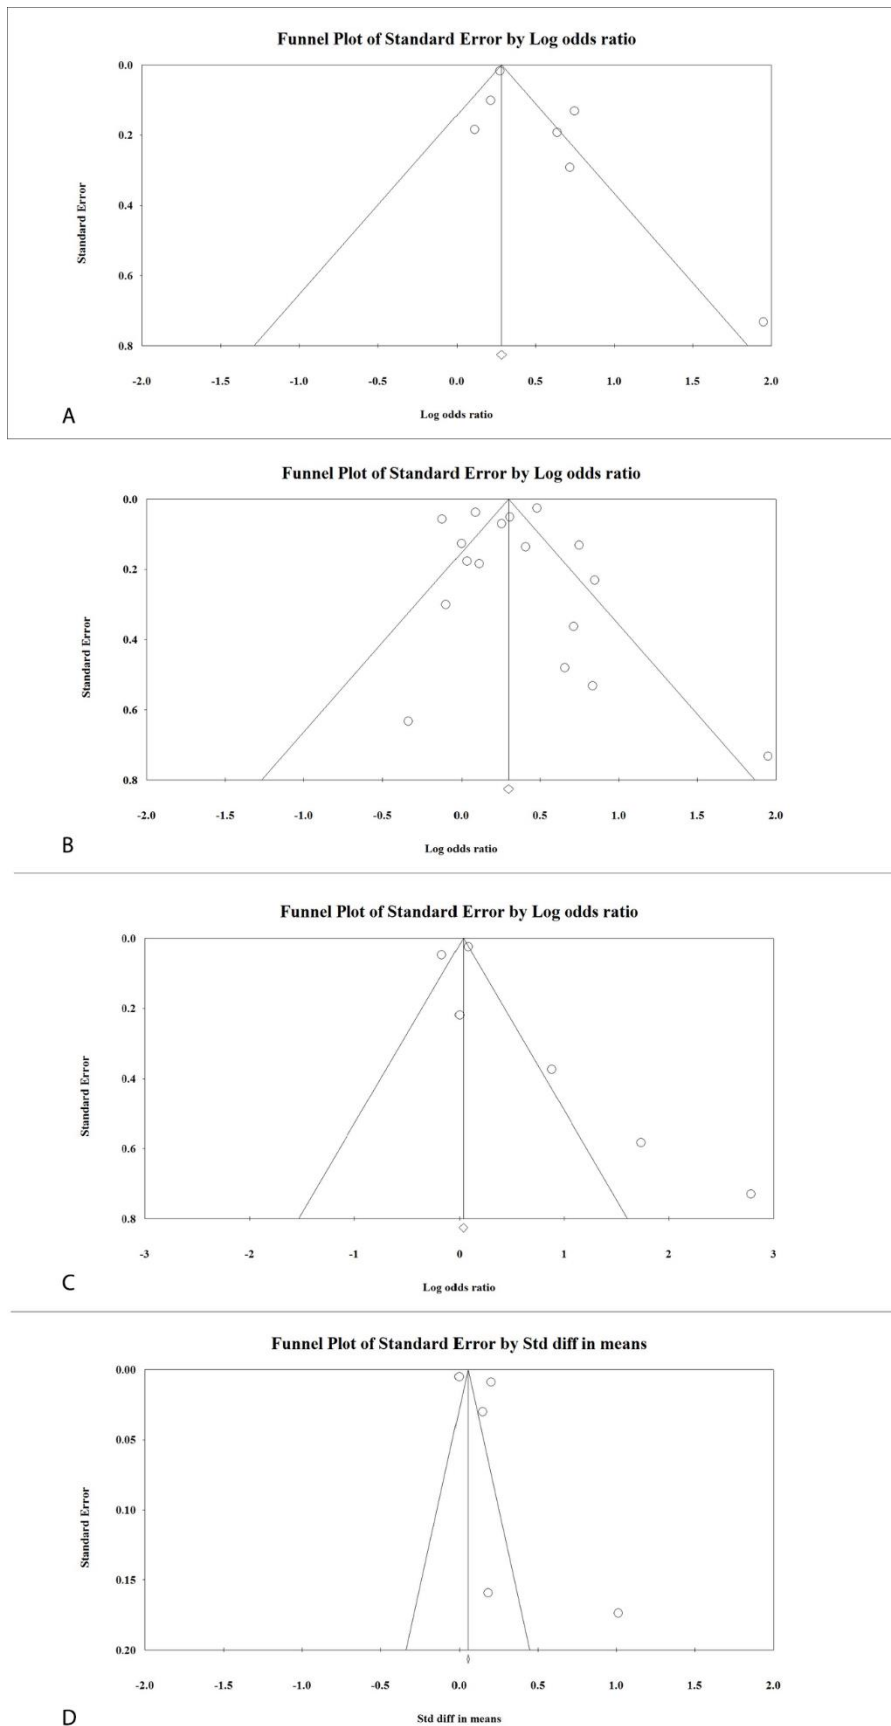

**SUPPLEMENTARY FIGURE 1.** A, Funnel plot for all complications. B, Funnel plot for the subgroup analysis for complications. C, Funnel plot for mortality data. D, Funnel plot for length of hospitalization data. Std diff, indicates standard difference.
