# Supplementary material for: Preexisting Diabetes Elevates Risk of Local and Systemic Complications in Acute Pancreatitis: Systematic Review and Meta-analysis
Source: PubMed Central journal article supplement — Pancreas. 2018 Aug 16;47(8):917–23. doi: 10.1097/MPA.0000000000001122 (PMC6133223; doi:10.1097/mpa.0000000000001122), 2018-08-16
Supplement: mpa-47-917-s002.pdf [file mpa-47-917-s002.pdf]

# Pre-existing Diabetes Elevates Risk of Local and Systemic Complications in Acute Pancreatitis

## Systematic Review and Meta-analysis

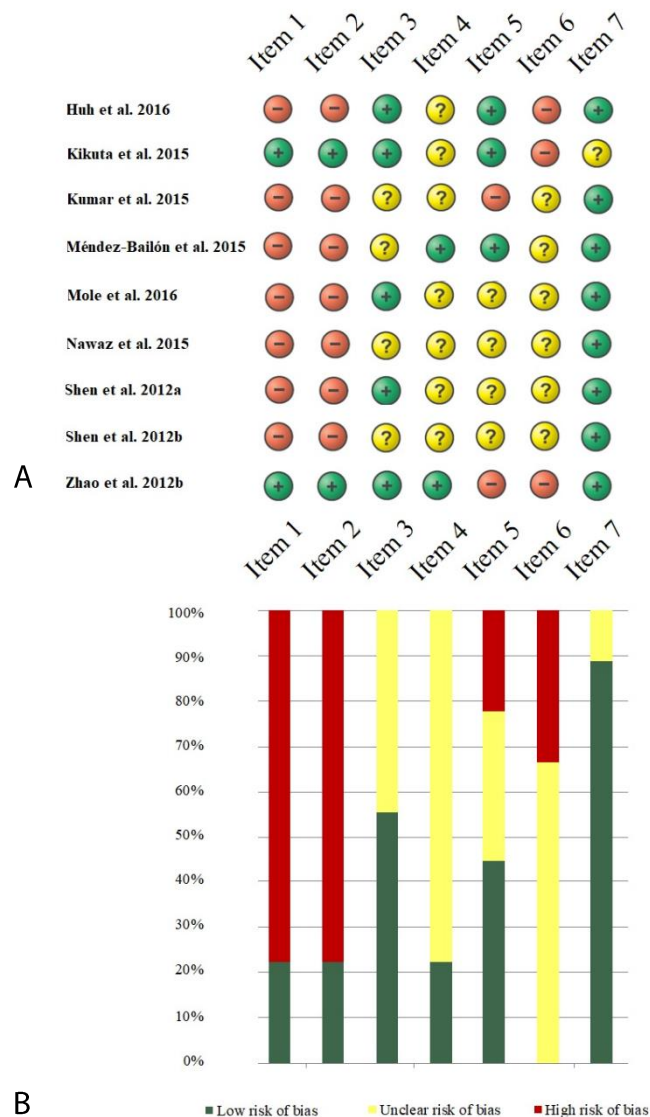

**SUPPLEMENTARY FIGURE 2.** A, Risk assessment of articles included in the meta-analysis based on the modified Newcastle-Ottawa Scale. B, Risk of bias assessment graph.
