# Supplementary material for: Preexisting Diabetes Elevates Risk of Local and Systemic Complications in Acute Pancreatitis: Systematic Review and Meta-analysis
Source: PubMed Central journal article supplement — Pancreas. 2018 Aug 16;47(8):917–23. doi: 10.1097/MPA.0000000000001122 (PMC6133223; doi:10.1097/mpa.0000000000001122), 2018-08-16
Supplement: mpa-47-917-s005.pdf [file mpa-47-917-s005.pdf]

Pre-existing Diabetes Elevates Risk of Local and Systemic Complications in Acute Pancreatitis  
Systematic Review and Meta-analysis

**SUPPLEMENTAL DIGITAL CONTENT**

**SUPPLEMENTARY TABLE 1.** Characteristics of Studies Evaluating Outcome Data of Acute Pancreatitis

| <b>Study</b>              | <b>Mortality</b> | <b>Cardiovascular</b> | <b>Respiratory</b> | <b>Renal</b> | <b>Neurologic</b> | <b>Local</b> | <b>ICU Admission</b> | <b>Length of Hospitalization</b> |
|---------------------------|------------------|-----------------------|--------------------|--------------|-------------------|--------------|----------------------|----------------------------------|
| Huh et al, 2016           | √                | —                     | —                  | —            | —                 | √            | √                    | √                                |
| Kikuta et al, 2015        | √                | √                     | √                  | √            | —                 | —            | —                    | —                                |
| Kumar et al, 2015         | —                | —                     | —                  | √            | —                 | —            | —                    | —                                |
| Méndez-Bailón et al, 2015 | √                | —                     | —                  | —            | —                 | —            | —                    | √                                |
| Mole et al, 2016          | —                | —                     | —                  | —            | —                 | —            | √                    | —                                |
| Nawaz et al, 2015         | √                | √                     | √                  | √            | —                 | —            | —                    | √                                |
| Shen et al, 2012a         | √                | √                     | √                  | √            | √                 | √            | √                    | √                                |
| Shen et al, 2012b         | —                | —                     | —                  | —            | —                 | √            | —                    | —                                |
| Zhao et al, 2012          | √                | —                     | —                  | —            | —                 | —            | —                    | √                                |

ICU, indicates intensive care unit.

**SUPPLEMENTARY TABLE 2.** Modified Newcastle–Ottawa Scale Criteria

|                      | <b>Adapted Newcastle-Ottawa Scale Items</b>                                             | <b>High-quality Items Carrying a Low Risk of Bias (Green)</b>                                                                                                                                                                                                                                                                                                                                                                                                                                    | <b>Low-quality Items Carrying a High (Red) or an Unknown (Yellow) Risk of Bias</b>                                                                                   |
|----------------------|-----------------------------------------------------------------------------------------|--------------------------------------------------------------------------------------------------------------------------------------------------------------------------------------------------------------------------------------------------------------------------------------------------------------------------------------------------------------------------------------------------------------------------------------------------------------------------------------------------|----------------------------------------------------------------------------------------------------------------------------------------------------------------------|
| <b>Selection</b>     | <b>Item 1:</b> Representativeness of the initial study population – AP with DM          | All patients with acute pancreatitis and concomitant diabetes mellitus were included.                                                                                                                                                                                                                                                                                                                                                                                                            | Low: any selection criteria were applied to the study population (e.g., inclusion of adults, those with severe AP).<br>Unknown: no data on selection process.        |
|                      | <b>Item 2:</b> Representativeness of the initial study population – AP without DM       | All patients with acute pancreatitis and without concomitant diabetes mellitus were included.                                                                                                                                                                                                                                                                                                                                                                                                    | Low: any selection criteria were applied to the study population (e.g., inclusion of adults, those with severe AP).<br>Unknown: no data on selection process.        |
|                      | <b>Item 3:</b> Diagnosis of AP and DM                                                   | AP patients met minimum two out of three of the following criteria: elevation of pancreatic enzymes (amylase and/or lipase) at least up to three times higher than the upper cut-off of the normal range, suffering from abdominal pain, inflammation detected with abdominal ultrasound scan and/or computed tomography. Standard definition of pre-existing diabetes mellitus was applied while the inclusion of newly diagnosed DM based on elevated HgbA1C is also acceptable. <sup>42</sup> | Low: definitions did not match the criteria listed in the high-quality column.<br>Unknown: no definitions of the conditions mentioned are provided.                  |
|                      | <b>Item 4:</b> Demonstration that outcome of interest was not present at start of study | There were no pre-existing chronic heart failure, chronic renal failure and/or chronic obstructive pulmonary disease in the study population.                                                                                                                                                                                                                                                                                                                                                    | Low: patients with pre-existing heart failure, chronic renal failure and/or chronic obstructive pulmonary disease.<br>Unknown: no statement.                         |
| <b>Comparability</b> | <b>Item 5:</b> Study controls for age                                                   | No significant difference was detected between diabetic and non-diabetic AP patients regarding age.                                                                                                                                                                                                                                                                                                                                                                                              | Low: significant difference was detected between diabetic and non-diabetic AP patients regarding age.<br>Unknown: no comparison made by age.                         |
|                      | <b>Item 6:</b> Study control for body mass index                                        | No significant difference was detected between diabetic and non-diabetic AP patients regarding body mass index <sup>43</sup> .                                                                                                                                                                                                                                                                                                                                                                   | Low: significant difference was detected between diabetic and non-diabetic AP patients regarding body mass index.<br>Unknown: no comparison made by body mass index. |
| <b>Outcome</b>       | <b>Item 7:</b> Adequacy of follow-up                                                    | Complete follow-up or incomplete follow-up with explanations revealing low risk of bias                                                                                                                                                                                                                                                                                                                                                                                                          | Low: incomplete follow-up with explanations revealing high risk of bias<br>Unknown: incomplete follow-up without explanation of the loss.                            |

AP indicates acute pancreatitis; DM, diabetes mellitus.

**SUPPLEMENTARY TABLE 3.** Stars Based on the Modified Newcastle–Ottawa Scale

| <b>ARTICLE</b>            | <b>Item 1</b> | <b>Item 2</b> | <b>Item 3</b> | <b>Item 4</b> | <b>Item 5</b> | <b>Item 6</b> | <b>Item 7</b> | <b>Total</b> |
|---------------------------|---------------|---------------|---------------|---------------|---------------|---------------|---------------|--------------|
| Huh et al, 2016           | -             | -             | *             | -             | *             | -             | *             | 3*           |
| Kikuta et al, 2015        | *             | *             | *             | -             | *             | -             | -             | 4*           |
| Kumar et al, 2015         | -             | -             | *             | -             | -             | -             | *             | 2*           |
| Méndez-Bailón et al, 2015 | -             | -             | -             | -             | *             | -             | *             | 2*           |
| Mole et al, 2016          | -             | -             | *             | -             | -             | -             | *             | 2*           |
| Nawaz et al, 2015         | -             | -             | -             | -             | -             | -             | *             | 1*           |
| Shen et al, 2012a         | -             | -             | -             | *             | *             | -             | *             | 3*           |
| Shen et al, 2012b         | -             | -             | -             | -             | -             | -             | *             | 1*           |
| Zhao et al, 2012          | *             | *             | *             | *             | -             | -             | *             | 5*           |

**SUPPLEMENTARY TABLE 4. PRISMA Checklist**

| Section/topic             | #  | Checklist item                                                                                                                                                                                                                                                                                              | Reported on page # |
|---------------------------|----|-------------------------------------------------------------------------------------------------------------------------------------------------------------------------------------------------------------------------------------------------------------------------------------------------------------|--------------------|
| <b>TITLE</b>              |    |                                                                                                                                                                                                                                                                                                             |                    |
| Title                     | 1  | Identify the report as a systematic review, meta-analysis, or both.                                                                                                                                                                                                                                         | 1                  |
| <b>ABSTRACT</b>           |    |                                                                                                                                                                                                                                                                                                             |                    |
| Structured summary        | 2  | Provide a structured summary including, as applicable: background; objectives; data sources; study eligibility criteria, participants, and interventions; study appraisal and synthesis methods; results; limitations; conclusions and implications of key findings; systematic review registration number. | 3                  |
| <b>INTRODUCTION</b>       |    |                                                                                                                                                                                                                                                                                                             |                    |
| Rationale                 | 3  | Describe the rationale for the review in the context of what is already known.                                                                                                                                                                                                                              | 5                  |
| Objectives                | 4  | Provide an explicit statement of questions being addressed with reference to participants, interventions, comparisons, outcomes, and study design (PICOS).                                                                                                                                                  | 6                  |
| <b>METHODS</b>            |    |                                                                                                                                                                                                                                                                                                             |                    |
| Protocol and registration | 5  | Indicate if a review protocol exists, if and where it can be accessed (e.g., Web address), and, if available, provide registration information including registration number.                                                                                                                               | 6                  |
| Eligibility criteria      | 6  | Specify study characteristics (e.g., PICOS, length of follow-up) and report characteristics (e.g., years considered, language, publication status) used as criteria for eligibility, giving rationale.                                                                                                      | 7                  |
| Information sources       | 7  | Describe all information sources (e.g., databases with dates of coverage, contact with study authors to identify additional studies) in the search and date last searched.                                                                                                                                  | 7                  |
| Search                    | 8  | Present full electronic search strategy for at least one database, including any limits used, such that it could be repeated.                                                                                                                                                                               | 6                  |
| Study selection           | 9  | State the process for selecting studies (i.e., screening, eligibility, included in systematic review, and, if applicable, included in the meta-analysis).                                                                                                                                                   | 7                  |
| Data collection process   | 10 | Describe method of data extraction from reports (e.g., piloted forms, independently, in duplicate) and any processes for obtaining and confirming data from investigators.                                                                                                                                  | 7                  |
| Data items                | 11 | List and define all variables for which data were sought (e.g., PICOS, funding sources) and any assumptions and simplifications made.                                                                                                                                                                       | 7                  |

| Section/topic                      | #  | Checklist item                                                                                                                                                                                                         | Reported on page #                 |
|------------------------------------|----|------------------------------------------------------------------------------------------------------------------------------------------------------------------------------------------------------------------------|------------------------------------|
| Risk of bias in individual studies | 12 | Describe methods used for assessing risk of bias of individual studies (including specification of whether this was done at the study or outcome level), and how this information is to be used in any data synthesis. | 8-9                                |
| Summary measures                   | 13 | State the principal summary measures (e.g., risk ratio, difference in means).                                                                                                                                          | 8-9                                |
| Synthesis of results               | 14 | Describe the methods of handling data and combining results of studies, if done, including measures of consistency (e.g., $I^2$ ) for each meta-analysis.                                                              | 8                                  |
| Risk of bias across studies        | 15 | Specify any assessment of risk of bias that may affect the cumulative evidence (e.g., publication bias, selective reporting within studies).                                                                           | 8-9                                |
| Additional analyses                | 16 | Describe methods of additional analyses (e.g., sensitivity or subgroup analyses, meta-regression), if done, indicating which were pre-specified.                                                                       | 8                                  |
| <b>RESULTS</b>                     |    |                                                                                                                                                                                                                        |                                    |
| Study selection                    | 17 | Give numbers of studies screened, assessed for eligibility, and included in the review, with reasons for exclusions at each stage, ideally with a flow diagram.                                                        | 9; Figure 1                        |
| Study characteristics              | 18 | For each study, present characteristics for which data were extracted (e.g., study size, PICOS, follow-up period) and provide the citations.                                                                           | Table 1.<br>Supplementary Table 1. |
| Risk of bias within studies        | 19 | Present data on risk of bias of each study and, if available, any outcome level assessment (see item 12).                                                                                                              | 10-11,<br>Supplementary Table 2-3  |
| Results of individual studies      | 20 | For all outcomes considered (benefits or harms), present, for each study: (a) simple summary data for each intervention group (b) effect estimates and confidence intervals, ideally with a forest plot.               | 10-11, Figure 2-5                  |
| Synthesis of results               | 21 | Present results of each meta-analysis done, including confidence intervals and measures of consistency.                                                                                                                | 10-11, Figure 2-5                  |
| Risk of bias across studies        | 22 | Present results of any assessment of risk of bias across studies (see Item 15).                                                                                                                                        | 11,<br>Supplementary Figure 1-2    |
| Additional analysis                | 23 | Give results of additional analyses, if done (e.g., sensitivity or subgroup analyses, meta-regression [see Item 16]).                                                                                                  | 11,<br>Supplementary Figure 3-4    |

| Section/topic                                                                                                                                                                                                                                                                                                                                         | #  | Checklist item                                                                                                                                                                       | Reported on page # |
|-------------------------------------------------------------------------------------------------------------------------------------------------------------------------------------------------------------------------------------------------------------------------------------------------------------------------------------------------------|----|--------------------------------------------------------------------------------------------------------------------------------------------------------------------------------------|--------------------|
| <b>DISCUSSION</b>                                                                                                                                                                                                                                                                                                                                     |    |                                                                                                                                                                                      |                    |
| Summary of evidence                                                                                                                                                                                                                                                                                                                                   | 24 | Summarize the main findings including the strength of evidence for each main outcome; consider their relevance to key groups (e.g., healthcare providers, users, and policy makers). | 12                 |
| Limitations                                                                                                                                                                                                                                                                                                                                           | 25 | Discuss limitations at study and outcome level (e.g., risk of bias), and at review-level (e.g., incomplete retrieval of identified research, reporting bias).                        | 14                 |
| Conclusions                                                                                                                                                                                                                                                                                                                                           | 26 | Provide a general interpretation of the results in the context of other evidence, and implications for future research.                                                              | 13                 |
| <b>FUNDING</b>                                                                                                                                                                                                                                                                                                                                        |    |                                                                                                                                                                                      |                    |
| Funding                                                                                                                                                                                                                                                                                                                                               | 27 | Describe sources of funding for the systematic review and other support (e.g., supply of data); role of funders for the systematic review.                                           | 2,14               |
| <p><i>From:</i> Moher D, Liberati A, Tetzlaff J, Altman DG, The PRISMA Group (2009). Preferred Reporting Items for Systematic Reviews and Meta-Analyses: The PRISMA Statement. PLoS Med 6(7): e1000097. doi:10.1371/journal.pmed1000097<br/> For more information, visit: <a href="http://www.prisma-statement.org">www.prisma-statement.org</a>.</p> |    |                                                                                                                                                                                      |                    |
